1 A novel GATA-binding protein 4 gene variation associated with familial atrial septal  
2 defect

3

4 Yongchao Yang<sup>1,4†</sup>, Yu Xia<sup>1,4†</sup>, Yueheng Wu<sup>1,3,4</sup>, Shufang Huang<sup>3,4</sup>, Yun Teng<sup>1</sup>,

5 Xiaobing Liu<sup>1</sup>, Ping Li<sup>2,3</sup>, Jimei Chen<sup>1,4</sup>, Jian Zhuang<sup>1,4\*</sup>

6 <sup>1</sup>Department of Cardiac Surgery, Guangdong Cardiovascular Institute, Guangdong

7 General Hospital, Guangdong Academy of Medical Sciences, Guangzhou,

8 Guangdong, China, 510100

9 <sup>2</sup>Department of Obstetrics and Gynecology, Guangdong General Hospital, Guangdong

10 Academy of Medical Science, Guangzhou, Guangdong, China, 510100

11 <sup>3</sup>Prenatal Diagnosis Center, Guangdong General Hospital, Guangdong Academy of

12 Medical Science, Guangzhou, Guangdong, China, 510100

13 <sup>4</sup>Guangdong Provincial Key Laboratory of South China Structural Heart Disease,

14 Guangdong General Hospital, Guangdong Academy of Medical Science, Guangzhou,

15 Guangdong, China, 510100

16 † Yongchao Yang and Yu Xia contributed equally to this article and share co-first

17 authorship.

18 \* Corresponding author

19 **Running Title:** Novel mutant GATA4 associated with ASD

20 **Keywords.** atrial septal defect; variation; GATA-binding protein 4; familial.

21 **Corresponding author:**

22 Jian Zhuang, Department of Pediatric Cardiovascular Surgery, Guangdong

23 Cardiovascular Institute, Guangdong General Hospital, Guangdong Academy of

24 Medical Sciences, 96 Dongchuan Road, Guangzhou 510100

25 Email: [zhuangjiangenetics@163.com](mailto:zhuangjiangenetics@163.com)

26

27 **Abstract**

28 Atrial septal defect (ASD) is the most common congenital heart defect. Part of ASD  
29 exhibits familial predisposition, but the genetic mechanism remains largely unknown.  
30 In the current study, we use multiple methods to identify and confirm the gene  
31 associated with a familial ASD. Chromosomal microarray analyses, whole exome  
32 sequencing, Sanger sequencing, multiple bioinformatics programs, in silico protein  
33 structure modeling and molecular dynamics simulation were performed to predict the  
34 pathogenic of the variant gene. Dual-Luciferase reporter gene assay was performed to  
35 evaluate the influence of downstream target gene of the target variation. A novel,  
36 heterozygous, missense variant GATA-binding protein 4 (*GATA4*):c.958C>T,  
37 p.R320W was identified. An autosomal dominant inheritance pattern with incomplete  
38 penetrance was observed in the family. Multiple prediction indicate the variant in  
39 *GATA4* to be deleterious. Molecular dynamics simulation further revealed that the  
40 variation of p.R320W could prevent the zinc finger of *GATA4* from interacting with  
41 the DNA. Dual-Luciferase reporter assay demonstrated a significant decrease in  
42 transcriptional activity ( $0.90 \pm 0.099$  vs  $1.50 \pm 0.079$ ,  $p = 0.001$ ) of the variant *GATA4*  
43 compared with the wild type. We believe the novel variation of *GATA4* (c.958C>T,  
44 p.R320W) with a pattern of incomplete inheritance that may be highly associated with  
45 this familial ASD. The finding enriched our knowledge of variations that may  
46 associated with ASD.

## 47 **Introduction**

48 Congenital heart defect (CHD) is one of the most common life-threatening birth  
49 defects, with an estimated incidence of 7 to 9 per one thousand and affecting 100,000  
50 to 150,000 newborns in China each year.<sup>1-3</sup> There are more than 400 identified variant  
51 genes, including *NKX2-5*, *MYH6*, *GATA4*, *ZIC3*, and *ELN*, associated with CHD and  
52 accounting for about 10% of CHD.<sup>4-7</sup> The ostium secundum atrial septal defect (ASD),  
53 comprising of approximately 30 to 40% of CHD, is one of the most common subtypes  
54 of interatrial communication,<sup>8</sup> and often associated with other cardiac and/or  
55 extra-cardiac anomalies and genetic syndromes.<sup>9</sup>

56 The understanding of the genetic pathogenesis mechanisms of ASD has  
57 significantly improved in recent decades. Pathogenic genomic copy number variants  
58 (CNVs) and gene variants have been identified in ASD. Rare CNVs at recurrent loci,  
59 such as 22q11.2, 5q35.1, 8p23.1, and 18q11.2, and more than ten genes, including as  
60 *NKX2-5*, *GATA4*, *GATA6*, *TBX5*, *TBX20*, and *CITED2*, have been associated with  
61 sporadic or inherited ASD.<sup>10-12</sup>

62 *GATA4*, a zinc finger transcription factor that contains seven exons located on  
63 chromosome 8p23.1-p22, plays an important role in early stage of embryonic heart  
64 development.<sup>13,14</sup> It is comprising of 442 amino acids with four conserved domains –  
65 transcription activation domain 1 (TAD1, amino acids (aa) 1 to 74), transcription  
66 activation domain 2 (TAD2, aa 130 to 177), N-terminal zinc finger (ZF1, aa 217 to  
67 241), and C-terminal zinc finger (ZF2, aa 271 to 295).<sup>14,15</sup> The nuclear localization  
68 signal (NLS, aa 271 to 325) allows *GATA4* to be imported to the nucleus via the

69 nuclear pore complex.<sup>14</sup> Small changes in the level of GATA4 protein expression can  
70 dramatically influence cardiac development and embryonic survival. Presently, there  
71 are 150 variant sites of *GATA4* that have been identified in association with different  
72 subtypes of CHD, including atrial septal defects, ventricular septal defects, tetralogy  
73 of Fallot, and atrial fibrillation.<sup>16-19</sup> There are 104 missense or nonsense variants of  
74 *GATA4* reported to be associated with these CHD in Human Gene Mutation Database  
75 (HGMD) (<http://www.hgmd.cf.ac.uk/ac/all.php>).

76 However, as a genetically heterogeneous disease, such a large number of  
77 variations still cannot fully cover the variations of ASD. Here, we use multiple  
78 methods to identify and confirm the variant gene associated with a familial ASD.

79

## 80 **Materials and methods**

### 81 **Study subjects**

82 A family with 8 members were enrolled in this study (II-2, III-1, III-2, III-3, IV-3,  
83 IV-4, IV-5 and IV-6, Figure 1). All enrolled members underwent a complete physical  
84 examination. Clinical data, including medical records, electrocardiograms, and  
85 echocardiography were systematically reviewed. The study protocol (protocol number  
86 20140829) was approved by the Research Ethics Committee of Guangdong General  
87 Hospital, Guangdong Academy of Medical Sciences, Guangdong, China. Informed  
88 written consent (informed consent form number 20150424) was obtained from all  
89 family members. Approximately 6.0 mL of peripheral blood was collected from each  
90 of the study participants. DNA was extracted from the peripheral blood lymphocytes

91 using modified salting-out precipitation method by Genra Puregene blood kit  
92 (QIAGEN, Santa Clara, CA, USA).

93

#### 94 **Chromosomal microarray analysis and CNV evaluation and validation**

95 Two hundred fifty nanograms (ng) of DNA was amplified from III-1, III-2, IV-3, and  
96 IV-4 (Fig. 1), then labeled and hybridized to the CytoScan HD array platform  
97 (Affymetrix, USA) according to the manufacturer's protocol. The array was designed  
98 specifically for cytogenetic research, offering more than 2,700,000 markers across the  
99 whole genome, including 750,000 SNP probes and 1,950,000 probes to detect CNVs  
100 (Cyto-arrays). Data were visualized and analyzed with the Chromosome Analysis  
101 Suite (ChAS) software package (Affymetrix, USA) with a minimal cutoff of 20  
102 consecutive markers in a length of 25-kb for CNVs calling. All of the segments were  
103 monitored for the degree of overlap with previously identified common CNVs,  
104 annotated by Database of Genomic Variants (DGV). All of the reported CNVs are  
105 based on NCBI human genome build 37 (hg 19).

106 Detected CNVs meeting the following criteria were selected for further analysis:  
107 (1) deletions greater than or equal to 50 kb and duplications greater than or equal to  
108 50 kb; (2) without recurrence in the normal populations that have been cataloged in  
109 DGV; and (3) possessing less than 50% overlap with known segmental duplications.

110 Following the American College of Medical Genetics and Genomics' (ACMG)  
111 standards and guidelines for the interpretation of CNVs, the remaining CNVs were  
112 classified into three categories—pathogenic (P), variants of uncertain significance

113 (VOUS), and benign (B). VOUS was further divided into three parts—likely  
114 pathogenic (LP), likely benign (LB), and no sub-classification (NS). For this study,  
115 only genes that function in a dominant manner that are within P and LP CNVs were  
116 investigated. All of the annotated CNVs were experimentally validated by real-time  
117 quantitative PCR (qPCR).

118

### 119 **Whole exome sequencing and variant analysis**

120 To systematically search for disease-causing genes, exome sequencing in three  
121 affected individuals and two unaffected individuals (parents of proband) from the  
122 family with a history of ASD was performed using the Agilent Sure Select Human All  
123 Exon V5 Kit on the Illumina HiSeq 2000 platform by Novogene Bioinformatics  
124 Technology Co., Ltd. One and 0.5 µg of genomic DNA from the proband was used to  
125 construct the exome library. The genomic DNA was sheared into fragments with a  
126 length of 180 to 280 bp by sonication and hybridized for enrichment according to the  
127 manufacturer's protocol. The library enriched for target regions was sequenced on the  
128 Illumina HiSeq 2000 platform to get paired-end reads with a read length of 100 bp.  
129 The average sequencing depth of 57.36X provided enough depth to exactly call  
130 variants at 97.4% of the targeted exome.

131 The human reference genome was obtained from the University of California  
132 Santa Cruz (UCSC) database (build 37.1, version hg19, <http://genome.ucsc.edu/>), and  
133 sequence alignment was performed using the Burrows-Wheeler Alignment tool.  
134 High-quality alignment was required to guarantee variant calling accuracy (greater

135 than 0). Picard (<http://sourceforge.net/projects/picard/>) was employed to mark  
136 duplicates resulting from PCR amplification. Genome Analysis Toolkit (GATK) Indel  
137 Realigner and GATK Realigner Target Creator were performed to do realignment  
138 around the indels. GATK Base Recalibrator was performed to do base quality score  
139 recalibration. GATK Variant Filtration was performed to make the raw callsets  
140 suitable for meaningful analysis. Exome CNV was performed for CNV detection.

141 Sequence Alignment/Map (SAM) tools were used to perform variant calling and  
142 identify single nucleotide polymorphisms (SNPs) or indels. After the analysis-ready  
143 Binary Alignment/Map (BAM) alignment result was obtained, Annotate Variation  
144 (ANNOVAR) was performed to annotate SNPs and indels. All candidate variants  
145 were filtered against the Single Nucleotide Polymorphism Database (dbSNP142,  
146 [http://www.ncbi.nlm.nih.gov/projects/SNP/snp\\_summary.cgi](http://www.ncbi.nlm.nih.gov/projects/SNP/snp_summary.cgi)), 1000 Genomes Project  
147 (2016 April release, <http://www.1000genomes.org/>), Exome Aggregation Consortium  
148 (ExAC, <http://exac.broadinstitute.org/>) and NHLBI Exome Sequencing Project (ESP)  
149 6500 to remove the polymorphism loci. Sorting Intolerant from Tolerant (SIFT) and  
150 Polymorphism Phenotyping version 2 (PolyPhen-2), Mutation Taster, and Combined  
151 Annotation Dependent Depletion (CADD) were performed to predict whether an  
152 amino acid substitution affects the function of the protein.

153 In addition to the standard variant quality controls, six independent filters were  
154 applied to facilitate detection of possible causal variants among the enrolled ASD  
155 patients. Variants were filtered by: (1) a minor allele frequency (MAF) of less than 1%  
156 in east Asian population; (2) CADD score of greater than 20; (3) the variants must be



157 pathogenic; (4) highly expressed in the heart or associated with cardiac development;  
158 (5) genotype–phenotype matched under the assumption of complete penetrance.

159

#### 160 **Sanger sequencing confirmation**

161 Direct Sanger sequencing was performed with ABI 3500 sequencer (Applied  
162 Biosystems, Foster City, CA, USA) to confirm potential causative variants in the  
163 family. Primer sequences for pathogenic variant in the *GATA4* gene (NM\_002052.4)  
164 were designed as follows: 5'-CAATGCCTGCGGCCTCTAC-3' and  
165 5'-AGGAAGAAGACAAGGGAGGACTG-3'. Once a variant was confirmed, all  
166 family members were screened to analyze variant segregation within the family.

167

#### 168 **Conservation analysis across species, in silico protein structure modeling and** 169 **molecular dynamics simulation**

170 The protein sequences of *GATA4* in 11 species from *Drosophila melanogaster* to  
171 *Homo sapiens* were aligned using Clustal X (version 1.81) software.

172 The wild type *GATA4* protein from the previous homology modeling study was  
173 used as the initial structure in molecular dynamics (MD) simulations. Then, the  
174 energy minimized and equilibrated structure was used to acquire the R320W mutant  
175 protein by using UCSF Chimera.<sup>20</sup> Finally, 10 ns MD simulations were performed for  
176 both wild type and mutant proteins of *GATA4*. All preparation and simulations were  
177 performed in AmberTools15 (Amber 2015, University of California, San Francisco).  
178 The Leap module was employed to assign AMBER ff14SB force field for protein and

179 zinc ( $Zn^{2+}$ ) ions.  $Zn^{2+}$  ions with coordinate atoms were constrained to be tetrahedron  
180 using the cationic dummy atom (CaDA) approach of Pang et al.<sup>21</sup> TIP3P water model  
181 was used and the box was set to 10 Å. Counter ions  $Cl^-$  were added in order to  
182 neutralize charges of the system. A 30 ns of NPT ensemble MD simulation was  
183 performed using Lengevin dynamics method<sup>22</sup> to control temperature with collision  
184 frequency of 1.0 ps<sup>-1</sup>. A SHAKE algorithm was applied to constrain bonds involving  
185 hydrogen atoms. The van der Waals cutoff was kept 10 Å and long range electrostatic  
186 interactions were treated using the Particle Mesh Ewald (PME)<sup>23</sup> method. Atomic  
187 coordinates were saved after every 500 steps. RMSD, RMSF, radial gyration (Rg),  
188 solvent accessible surface area (SASA) and secondary structure analyses were carried  
189 out to study the effect that mutagenesis would have on the structure and functions of  
190 GATA4 protein.

191

## 192 **Plasmids and site-directed mutagenesis**

193 The full-length wild type cDNA of the human *GATA4* gene was amplified by PCR  
194 using PrimeSTAR® HS DNA Polymerase (Takara, Liaoning, CHN) and primers  
195 (5'-GGGGTACCATGTATCAGAGCTTGGCCATGGCC-3' and  
196 5'-CCGCTCGAGTTACGCAGTGATTATGTCCCC-GTGA-3'). PCR fragments were  
197 double digested by endonucleases KpnI and XhoI (Thermo Fisher, Shanghai, CHN).  
198 The digested product was fractionated by using 1.5% agarose gel electrophoresis,  
199 purified by using the E.Z.N.A® Gel Extraction Kit (OMEGA, Norcross, GA, USA),  
200 and then subcloned into pcDNA3.1 (Promega, Beijing, CHN) to construct the

201 recombinant eukaryotic expression vector WT-pcDNA3.1-hGATA4.

202 The *GATA4* variant c.958C>T (p.R320W) was introduced into a wildtype *GATA4*  
203 clone using a QuikChange Site-Directed Mutagenesis Kit (Stratagene, Agilent  
204 Technologies, CA, USA) and primers  
205 (5'-ATCCAAACCAGAAAATGGAAGCCCAAGAACC-3' and  
206 5'-GGTTCTTGGGCTTCCATTTTCTGGTTTGGAT-3'). The clones were sequenced  
207 to confirm the expected variant and exclude other variants.

208

### 209 **Dual-Luciferase assays**

210 293T cells were transiently transfected with 400 ng brain natriuretic peptide  
211 (*BNP*)-luciferase reporter plasmid and internal control reporter plasmid pGL4.75  
212 [hRluc/CMV] (Promega, Southampton, UK) in combination with 100 ng of wild type  
213 *GATA4*, mutant type *GATA4* p.R320W, or pcDNA3 plasmids using Lipofectamine<sup>TM</sup>  
214 2000 (Invitrogen, Cat.) according to the manufacturer's protocol. Luciferase activity  
215 was measured 48 hours after transfection using the Dual-Glo Luciferase Assay  
216 (Promega, Southampton, UK) according to the manufacturer's protocol. Mean  
217 luciferase activity was calculated after normalization to Renilla luciferase activity.  
218 The experiments were performed and repeated at least three times respectively.  
219 Finally, the expression level of protein *GATA4* were evaluated by western blot  
220 analysis.

221

### 222 **Statistical Analysis**

223 Statistical analysis was performed with SAS-PC (9.3v, SAS Institute, Inc, Cary, NC).  
224 Results are expressed as mean  $\pm$  Standard Deviation (SD). Logarithmic  
225 transformation was applied to the data for the luciferase assay to achieve approximate  
226 normality. Comparisons between two groups were performed with the chi-square test.  
227 Statistical significance was determined by two-way analysis of variance and  
228 subsequent pairwise comparisons were performed. A *p* value of less than 0.05 was  
229 considered to be statistically significant.

230

### 231 **Data availability**

232 The authors state that all data necessary for confirming the conclusions presented in  
233 the article are represented fully within the article.

234

## 235 **Results**

### 236 **Clinical Characteristics**

237 The proband of this family is the second child, who was diagnosed with ostium  
238 secundum atrial septal defect by ultrasound (IV-4) (Fig. 1). After reviewing the family  
239 history, we identified the first child (IV-3) (Fig. 1) was also affected by the same  
240 defect and had been cured by transcatheter closure four years prior to our interview.  
241 The mother of proband was not detected with any cardiac disorders by  
242 echocardiogram (III-2) (Figure 1). The maternal grandmother (II-2) (Fig. 1) indicated  
243 upon interview that she had undergone cardiac surgery due to ASD when she was  
244 approximately 20 years of age (the detail medical records were missing). She also

245 informed us that her mother (I-2) (Fig. 1) may have had a cardiac disorder as she was  
246 unable to perform manual labor and died due to an unidentified cause at  
247 approximately 40 years of age. The mother of the proband had two abnormal  
248 pregnancies with a spontaneous miscarriage at approximately 8 weeks during the first  
249 pregnancy (IV-1) (Fig. 1) and a termination due to the detection of fetal bradycardia at  
250 18<sup>th</sup> week during the second pregnancy (IV-2) (Fig. 1). Conventional G-banded  
251 cytogenetic analysis was performed for patients II-2, III-1, III.2, IV-3 and IV-4, but no  
252 clinically significant result was found.

253

#### 254 **No significant CNV was found associated with ASD**

255 CMA was performed on DNA samples from members III-1, III-2, IV-3, and IV-4.  
256 There was only one subject (III-1) with detection of a 1.641 Mb duplication at  
257 Yq11.223 (chrY: 24,148,853-25,790,030). This duplication only contains one disease  
258 causing gene of *DAZI* according to OMIM. The deletion of this gene may be related  
259 to spermatogenesis, but it is unknown if its duplication has any significant clinical  
260 annotation.

261

#### 262 ***GATA4* was located as target variant gene for this familial ASD**

263 Exome analysis was performed on five DNA samples from members II-2, III-1, III-2,  
264 IV-3 and IV-4. A total of 19,816,364 pairs of sequenced reads with the average read  
265 length of 125 bp were generated by exome sequencing. Approximately 98.76%  
266 (19,569,878) of sequenced reads passed the quality assessment and were mapped to

267 99.81% of the human reference genome. There were more than 20,000 indels,  
268 167,000 SNPs and 10 CNVs found in each subject. After filtering, more than 1500  
269 variants including SNP and indels were shared by II-2, IV-3 and IV-4, and finally, a  
270 heterozygous missense variant *GATA4*: NM\_002052: exon4: c.C958T: p.R320W  
271 (CADD\_Phred score: 35, SIFT score: 0.0, Polyphen2\_HVAR score: 0.999,  
272 Polyphen2\_HDIV score: 1.0, Mutation Taster predict: Disease causing), was selected  
273 as our target pathogenic variant detected in IV-3, IV-4, III-2 and II-2.

274 In order to validate the target variant, we performed the Sanger sequencing in all  
275 relevant subjects (II-2, III-1, III-2, III-3, IV-3, IV-4, IV-5 and IV-6) (Fig. 2A). The  
276 heterozygous *GATA4* p.R320W variant was found in subjects II-2, III.2, IV-3 and IV-4  
277 but not in subjects III-1, III-3, IV-5 and IV-6 (Table 1).

278

279 **The variant site of *GATA4* is evolutionarily conserved and plays an important**  
280 **role in the region of nuclear localization signal**

281 A cross-species alignment of the *GATA4* amino acid sequences revealed that the  
282 altered amino acid arginine (CGG) at position 320 was completely conserved  
283 evolutionarily (Fig. 2B). The identified variant is located in the region of the nuclear  
284 localization signal (Fig. 2C), which plays an important role in the nuclear  
285 translocation of *GATA4*.<sup>14</sup>

286 After structure preparation and MD simulation, we found the amino acid  
287 structure of *GATA4* in position of 214-322 mainly contains two zinc binding regions  
288 linked by a random coil, with the variant site located at one end of coil. In wild type

289 *GATA4*, the random coil is far from the other zinc binding region without any  
290 connection. The structure has an “open loop”, with an angle of 167° between the  
291 two-helix structures of zinc binding regions (Fig. 3A). In the mutant *GATA4*,  
292 connections via hydrogen bonds and hydrophobic interactions between the random  
293 coil and the opposite side of zinc binding region were formed. The structure has a  
294 “closed loop”, with an angle of about 73° (Fig. 3C). This was likely due to the change  
295 of electric charge from the variation of Arg320 to Trp320 where Trp320 formed the  
296 hydrophobic interaction with Leu227 and hydrogen bonds with Arg230. The variant  
297 also forced a change of the random coil in segments of 256 to 259 into a helical  
298 structure (Fig. 3B, 3D).

299

### 300 **Variation of *GATA4* significantly decrease the expression of *BNP***

301 Previous studies have revealed that *GATA4* is an upstream transcriptional regulator of  
302 several genes expressed in different signaling pathway during cardiac development,  
303 including genes that encode atrial natriuretic peptide (*ANP*), brain natriuretic peptide  
304 (*BNP*), and  $\beta$ -myosin heavy chain (*MHC*).<sup>13</sup> Therefore, the functional effect of the  
305 *GATA4* variant may be reflected by biochemical analysis of the transcriptional activity  
306 of the *BNP* promoter in cells transfected with mutant *GATA4* in contrast to its wild  
307 type counterpart.

308 In the dual-luciferase reporter assay (Fig. 4A), we found wild type *GATA4* can  
309 significantly increase the transcription of *BNP* in comparison with nature control type  
310 ( $1.50 \pm 0.079$  vs  $1.0 \pm 0.064$ ,  $p = 0.001$ ), which in accordance to previous knowledge

311 that *GATA4* is activating transcription factor for *BNP*. The mutant *GATA4* displayed a  
312 significant decrease in transcriptional activity in comparison to wild type ( $0.90 \pm$   
313  $0.099$  vs  $1.50 \pm 0.079$ ,  $p = 0.001$ ). There is no significantly difference in protein levels  
314 between wild type and mutant *GATA4* by analyzing of Western blot (Fig. 4B).

315

## 316 Discussion

317 We interviewed and evaluated members of a family with at least 3 patients diagnosed  
318 with ASD in the clinic. After a complete examination including karyotyping, CMA,  
319 WES and Sanger sequencing for the whole family, we found a novel, heterozygous,  
320 missense variation of *GATA4*, c.C958T:p.R320W, in 3 patients with ASD and one  
321 unaffected carrier (the mother). This finding was not consistent with traditional  
322 autosomal dominant Mendelian inheritance. Interestingly, E. D'Amato et al<sup>24</sup> reported  
323 a heterozygous missense variant *GATA4* c.1512C>T, p.Arg319Trp by HGMD in two  
324 children from an Italian family with pancreatic agenesis and ASD, also with the  
325 inheritance of incomplete penetrance. There is no completely reasonable explanation  
326 for this type of inheritance, it may also be related to complicated gene–gene or gene–  
327 environment interactions. With the childbearing history of two terminal pregnancies,  
328 the pleiotropism of the gene may explain why the proband's mother carried the same  
329 *GATA4* variant but had distinct clinical phenotypes. This phenomenon may highlight  
330 the fact that even in a familial CHD, the underlying genetic etiology can be complex.

331 There is no record of this variant in the databases of 1000G, ESP6500, ExAC  
332 and NCBI. However, the bioinformatics programs across all prediction algorithms,



333 including PolyPhen-2, SIFT, Mutation Taster, and CADD, etc. According to the  
334 conclusions of Philips AS, our finding of the *GATA4* variant p.R320W may be  
335 pathogenic.<sup>14</sup> The algorithms demonstrated that four amino acids, Arg282, Arg283,  
336 Arg317, Arg319, played crucial roles in nuclear localization of *Gata4* in murine cell  
337 line models. Coincidentally, we identified the same variant site of Arg320 (the same  
338 site with murine Arg319) in this family. Given that this variant site is highly  
339 evolutionarily conserved across 11 species, the variant may lead to a pathogenic  
340 change of function after translated into protein. Our prediction of molecular  
341 architecture of *GATA4* protein shows the influence of the variant on changing the  
342 stability of conformation and structure, which may decrease or inhibit its function in  
343 transcription. Therefore, it is very likely that dysfunctional *GATA4* contributes to ASD  
344 in this family.

345 As a key transcription factor, *GATA4* regulates transcription of many genes  
346 involved heart development, including *MHC*, *ANP*, *BNP* and endothelial nitric oxide  
347 synthesis (*eNOS*),<sup>13,25</sup> and *GATA4* also plays an essential role in cardiac adaptive  
348 responses, including myocyte survival, angiogenesis, and hypertrophy in response to  
349 exercise.<sup>13, 25-27</sup> In our dual-luciferase reporter assay, we also confirmed that *GATA4* is  
350 a transcriptional factor of *BNP*. The variation of *GATA4* p.R320W significantly  
351 decreased its transcriptional activity on downstream cardiac genes of *BNP* in 293T  
352 cells, indicating that this variant could contribute to the pathogenesis of ASD.

353 Our study demonstrates the fact that CMA and WES are reliable techniques in  
354 detection of pathogenic variants in familial ASD. Detailed clinical genetic data will

355 facilitate genetic diagnosis and counseling when evaluating the prognosis of newborns  
356 and the future risks for other family members with new pregnancies. Our future work  
357 will focus on exploring the change of relevant signaling pathway caused by the  
358 variation of *GATA4* and the prevalence of this variant site in population of ASD.

359

### 360 **Conclusion**

361 In conclusion, we identified a novel variation of *GATA4* (c.958C>T, p.R320W) in  
362 familial ASD. The identified variant caused impaired biological function of the  
363 protein in vitro, suggesting that it is likely to play a role in the pathogenesis of ASD.  
364 Reasonable use of a variety of variant detection techniques will help us to identify  
365 pathogenic variants in CHD patients, especially in familial disease. Elucidation of the  
366 genetic basis of CHD has valuable clinical implications and will continue to expand  
367 our understanding of the pathogenesis of CHD.

368 **Conflict of Interest**

369 The authors declare that there are no conflicts of interest.

370

371 **Acknowledgments**

372 We sincerely thank all the patients and their family members for their enthusiasm and  
373 continued participation in this study. We also thank the clinicians and physicians for  
374 sending blood samples.

375

376 **Funding**

377 This work was supported by the Science and Technology Department of Guangdong  
378 Province [grant numbers 2017A070701013, 2014A050503048 and 2013B030400001];  
379 the Guangdong Provincial Key Laboratory of South China Structural Heart Disease  
380 [grant number 2012A061400008]; the National Natural Science Foundation for Young  
381 Scientists of China [grant numbers 81700223]; and the Foundation of Guangdong  
382 Medical Science and Technology Research [grant numbers A2016116 and A2017097].

383 **Reference**

384 [1]van der Linde D, Konings EE, Slager MA, Witsenburg M, Helbing WA, et al. Birth  
385 prevalence of congenital heart disease worldwide: a systematic review and  
386 meta-analysis. *J Am Coll Cardiol.* 2011; 58:2241-7.

387 [2]Bernier PL, Stefanescu A, Samoukovic G, Tchervenkov CI. The challenge of  
388 congenital heart disease worldwide: epidemiologic and demographic facts. *Semin  
389 Thorac Cardiovasc Surg Pediatr Card Surg Annu.* 2010; 13:26-34.

390 [3]Hu Z, Yuan X, Rao K, Zheng Z, Hu S. National trend in congenital heart disease  
391 mortality in China during 2003 to 2010: a population-based study. *J Thorac  
392 Cardiovasc Surg.* 2014; 148:596-602.

393 [4]Gelb BD. Recent advances in understanding the genetics of congenital heart  
394 defects. *Curr Opin Pediatr.* 2013;25:561-6.

395 [5]Ellesøe SG, Johansen MM, Bjerre JV, et al. Familial Atrial Septal Defect and  
396 Sudden Cardiac Death: Identification of a Novel NKX2-5 Mutation and a Review of  
397 the Literature. *Congenit Heart Dis.* 2016; 11(3):283-90.

398 [6]Theis JL, Zimmermann MT, Evans JM, et al. Recessive MYH6 mutations in  
399 hypoplastic left heart with reduced ejection fraction. *Circ Cardiovasc Genet.* 2015;  
400 8:564–571

401 [7]El Malti R, Liu H, Doray B, et al. A systematic variant screening in familial cases  
402 of congenital heart defects demonstrates the usefulness of molecular genetics in this  
403 field. *Eur J Hum Genet.* 2016; 24:228–236.

404 [8]Hoffman JI, Kaplan S. The incidence of congenital heart disease. *J Am Coll*

405 Cardiol. 2002; 39:1890-900.

406 [9]Jin SC, Homsy J, Zaidi S, et al. Contribution of rare inherited and de novo variants  
407 in 2,871 congenital heart disease probands. Nat Genet. 2017; 49:1593-1601.

408 [10]Pires R, Pires LM, Vaz SO, et al. Screening of copy number variants in the  
409 22q11.2 region of congenital heart disease patients from the São Miguel Island,  
410 Azores, revealed the second patient with a triplication. BMC Genet. 2014;15:115.

411 [11]Fahed AC, Gelb BD, Seidman JG, Seidman CE. Genetics of congenital heart  
412 disease: the glass half empty. Circ Res. 2013;112:707-20.

413 [12]Lalani SR, Belmont JW. Genetic basis of congenital cardiovascular  
414 malformations. Eur J Med Genet. 2014;57:402-13.

415 [13]Molkentin JD. The zinc finger-containing transcription factors GATA-4, -5, and  
416 -6. Ubiquitously expressed regulators of tissue-specific gene expression. J Biol Chem.  
417 2000;275:38949-52.

418 [14]Philips AS, Kwok JC, Chong BH. Analysis of the signals and mechanisms  
419 mediating nuclear trafficking of GATA-4. Loss of DNA binding is associated with  
420 localization in intranuclear speckles. J Biol Chem. 2007;282:24915-27.

421 [15]Reamon-Buettner SM, Borlak J. GATA4 zinc finger mutations as a molecular  
422 rationale for septation defects of the human heart. J Med Genet. 2005;42:e32.

423 [16]Yang YQ, Gharibeh L, Li RG, Xin YF, Wang J, Liu ZM, Qiu XB, Xu YJ, Xu L,  
424 Qu XK, Liu X, Fang WY, Huang RT, Xue S, Nemer G. GATA4 loss-of-function  
425 mutations underlie familial tetralogy of fallot. Hum Mutat. 2013;34:1662-71.

426 [17]Chen Y, Han ZQ, Yan WD, Tang CZ, Xie JY, Chen H, Hu DY. A novel mutation

427 in GATA4 gene associated with dominant inherited familial atrial septal defect. J

428 Thorac Cardiovasc Surg. 2010;140:684-7.

429 [18]Yang YQ, Li L, Wang J, Liu XY, Chen XZ, Zhang W, Wang XZ, Jiang JQ, Liu X,

430 Fang WY. A novel GATA4 loss-of-function mutation associated with congenital

431 ventricular septal defect. *Pediatr Cardiol.* 2012;33:539-46.

432 [19]Posch MG, Boldt LH, Polotzki M, Richter S, Rolf S, Perrot A, Dietz R, Ozcelik C,

433 Haverkamp W. Mutations in the cardiac transcription factor GATA4 in patients with

434 lone atrial fibrillation. *Eur J Med Genet.* 2010;53:201-3.

435 [20]Pettersen EF, Goddard TD, Huang CC, et al. UCSF Chimera—A visualization

436 system for exploratory research and analysis. *J Comput Chem.* 2004; 25:1605-12.

437 [21]Pang, Y.-P. Novel zinc protein molecular dynamics simulations: Steps toward

438 antiangiogenesis for cancer treatment. *Journal of Molecular Modeling.* 1999,

439 5:196-202.

440 [22]Jean-Paul Ryckaert, Giovanni Ciccotti, Herman J. C. Berendsen. Numerical

441 integration of the cartesian equations of motion of a system with constraints:

442 Molecular Dynamics of N-alkanes. *Journal of Computational Physics,* 1977,

443 23:327-41.

444 [23]Tom Darden, Darrin York, and Lee Pedersen. Particle mesh Ewald: An N log (N)

445 method for Ewald sums in large systems. *Journal of Chemical Physics,* 1993,

446 98:10089-92.

447 [24]D'Amato E, Giacomelli F, Giannattasio A, D'Annunzio G, Bocciardi R, Musso M,

448 Lorini R, Ravazzolo R. Genetic investigation in an Italian child with an unusual

449 association of atrial septal defect, attributable to a new familial GATA4 gene mutation,  
450 and neonatal diabetes due to pancreatic agenesis. *Diabet Med.* 2010;27:1195-200.

451 [25]Heineke J, Auger-Messier M, Xu J, Oka T, Sargent MA, York A, Klevitsky R,  
452 Vaikunth S, Duncan SA, Aronow BJ, Robbins J, Crombleholme TM, Molkenin JD.  
453 Cardiomyocyte GATA4 functions as a stress-responsive regulator of angiogenesis in  
454 the murine heart. *J Clin Invest.* 2007;117:3198-210.

455 [26]Bisping E, Ikeda S, Kong SW, Tarnavski O, Bodyak N, McMullen JR, Rajagopal  
456 S, Son JK, Ma Q, Springer Z, Kang PM, Izumo S, Pu WT. Gata4 is required for  
457 maintenance of postnatal cardiac function and protection from pressure  
458 overload-induced heart failure. *Proc Natl Acad Sci U S A.* 2006;103:14471-6.

459 [27]Liang Q, De Windt LJ, Witt SA, Kimball TR, Markham BE, Molkenin JD. The  
460 transcription factors GATA4 and GATA6 regulate cardiomyocyte hypertrophy in  
461 vitro and in vivo. *J Biol Chem.* 2001;276:30245-53.

462 **Figure legends**

463 **Figure 1. Pedigree of the nuclear and extended family showing affected and**  
464 **unaffected members with ASD.**

465 Subjects I1 and III1 died naturally. Subject I2 was a suspected positive. Subjects II2,  
466 IV3, and IV4 were affected patients. Subject III2 was a carrier. Subject IV1,  
467 miscarried at the 8th week of pregnancy. Subject IV2, mid-trimester aborted for fetal  
468 bradycardia. The arrow indicates the proband patient. '?' indicates the suspected  
469 patient. The oblique line represents a deceased subject.

470

471 **Figure 2. Heterozygous missense variation of *GATA4* in the family and the**  
472 **conservation analysis of the variant site.**

473 (A): The arrow indicates the heterozygous nucleotides of C/T. Subject III-1 shows the  
474 normal individual. Subjects IV-3, IV-4, III-2 and II-2 show the missense variant. The  
475 rectangle denotes the nucleotides comprising a codon of *GATA4*. (B) Alignment of  
476 multiple *GATA4* amino acid sequences across species. The altered arginine at amino  
477 acid position 320 (p.R320) of *GATA4* is completely conserved evolutionarily among  
478 various species. The yellow column shows the R320 site. The fluorescent blue shows  
479 unconserved sites in different species around the R320 site. (C) Schematic diagram of  
480 *GATA4* protein. TAD1: transcription activation domain 1 (amino acid 1-74); TAD2:  
481 transcription activation domain 2 (aa 130–177); ZF1: N-terminal zinc finger (aa 217–  
482 241); ZF2: C-terminal zinc finger (aa 271–295); NLS: nuclear localization signal  
483 region (aa 307–325). Red bar shows NLS and the red letters are mutant amino acids



484 (R320>W).

485

486 **Figure 3. The structural difference between wild type and mutant *GATA4*.**

487 (A and B): wild type; (C and D): mutant *GATA4*. Colorful cartoon depicting the

488 protein of *GATA4*. Red indicates the  $\alpha$ -Helix while yellow indicates the  $\beta$ -Sheet.

489 Green shows a random coil. Sphere and stick of blue shows the variant site. Wheat

490 shows the related residues. Dotted line in (D) shows the new hydrogen bonds. Blue

491 dotted line in (A) and (C) shows the angle of two  $\alpha$ -helices.

492

493 **Figure 4. Diminished transcriptional activity of *GATA4* caused by the variation.**

494 (A) 293T cells were transfected with 100 ng of wild type, mutant *GATA4* or pcDNA3

495 plasmids and 400 ng of BNP luciferase reporter. The result showed the transcriptional

496 activity of mutant *GATA4* significantly decreased in comparison to wild type. NC:

497 negative control; WT: wild type; MUT: mutant. Data is displayed as mean  $\pm$  SD; NC

498 was set as 1.0; \* represent a statistically significant difference with  $p < 0.01$ .

499 (B) The protein levels of wild type and mutant *GATA4* were evaluated by western

500 blot analysis after 293T cells were transfected with 100 ng of either type of plasmid.

501 No significantly differences were observed between the two groups.

I

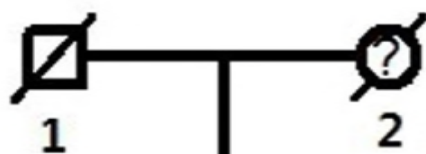

II

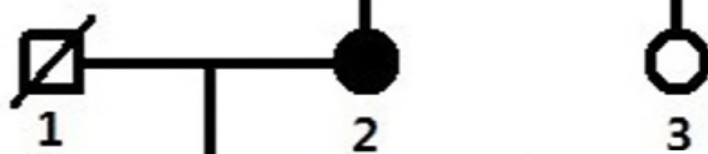

III

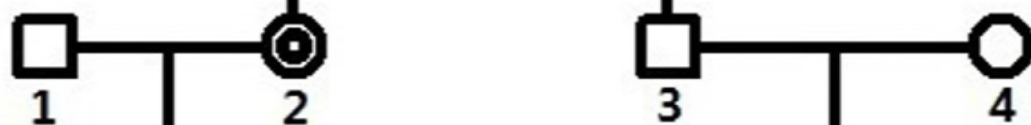

IV

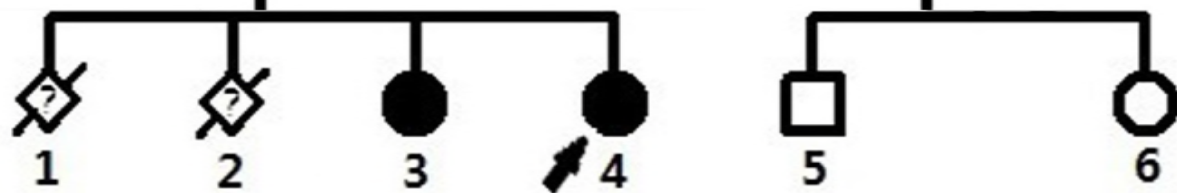

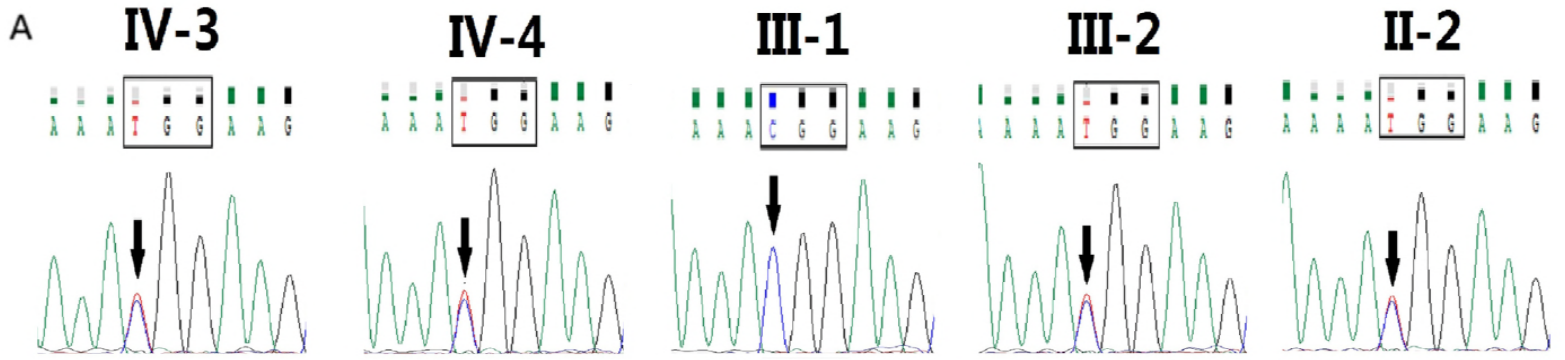

**B**

|                               |     |                                |          |                  |     |
|-------------------------------|-----|--------------------------------|----------|------------------|-----|
| Homo Sapiens_GATA4            | 307 | L A M R K E G I Q T R K        | <b>R</b> | K P K N L        | 325 |
| Pan troglodytes_GATA4         | 273 | L A M R K E G I Q T R K        | <b>R</b> | K P K N L        | 291 |
| Macaca mulatta_GATA4          | 308 | L A M R K E G I Q T R K        | <b>R</b> | K P K N L        | 326 |
| Canis lupus familiaris_GATA4  | 307 | L A M R K E G I Q T R K        | <b>R</b> | K P K N L        | 325 |
| Bos taurus_GATA4              | 307 | L A M R K E G I Q T R K        | <b>R</b> | K P K N L        | 325 |
| Mus musculus_GATA4            | 306 | L A M R K E G I Q T R K        | <b>R</b> | K P K N L        | 324 |
| Rattus norvegicus_GATA4       | 306 | L A M R K E G I Q T R K        | <b>R</b> | K P K N L        | 324 |
| Gallus gallus_gata4           | 277 | L A M R K E G I Q T R K        | <b>R</b> | K P K N L        | 295 |
| Danio rerio_GATA4             | 260 | L A M <b>K</b> K E G I Q T R K | <b>R</b> | K P K N L        | 278 |
| Xenopus tropicalis_GATA4      | 276 | L A M <b>K</b> K E G I Q T R K | <b>R</b> | K P K N L        | 294 |
| Drosophila melanogaster_GATA4 | 262 | L A M R K <b>D</b> G I Q T R K | <b>R</b> | K P K <b>K T</b> | 280 |

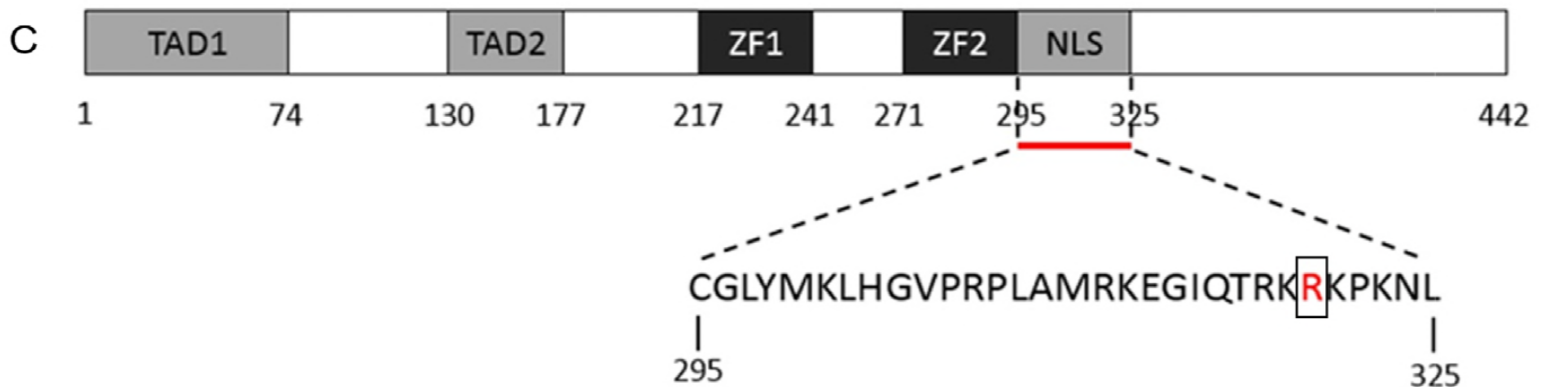

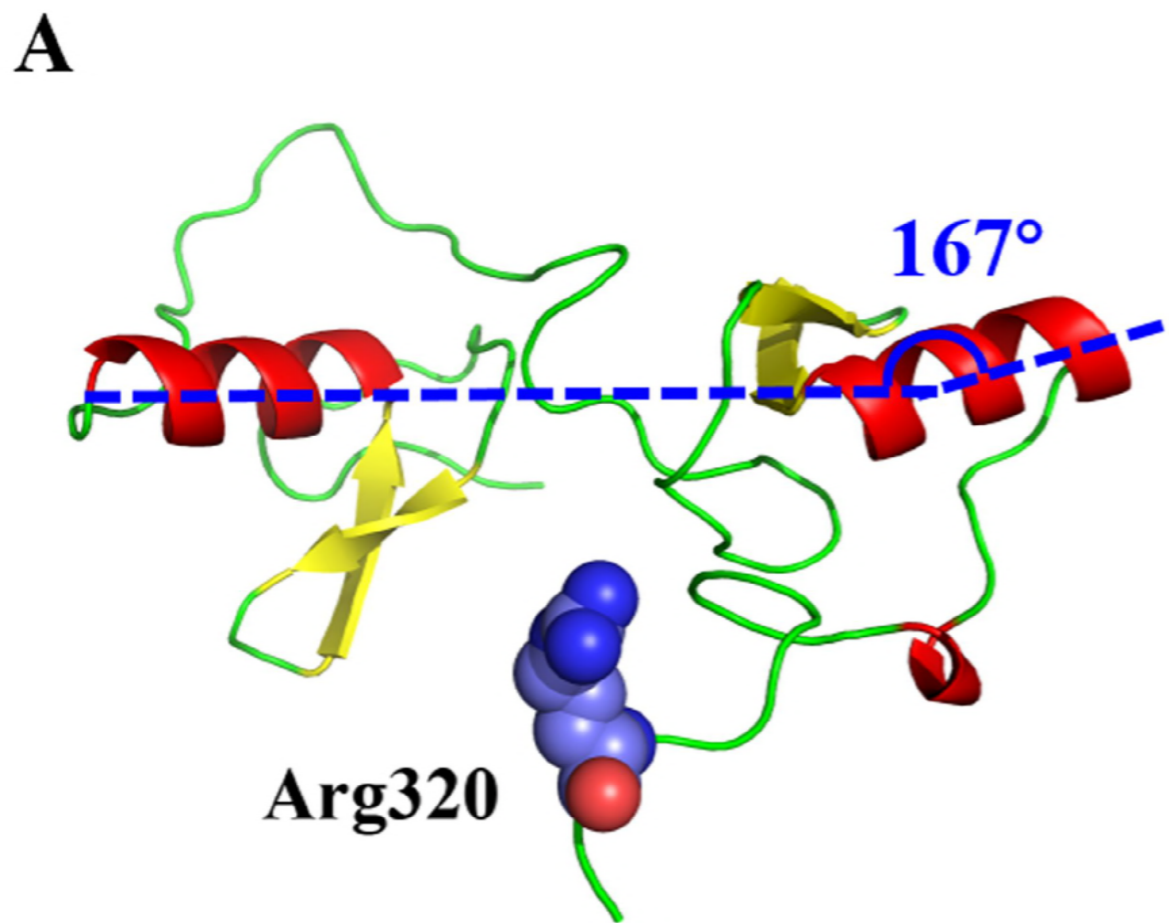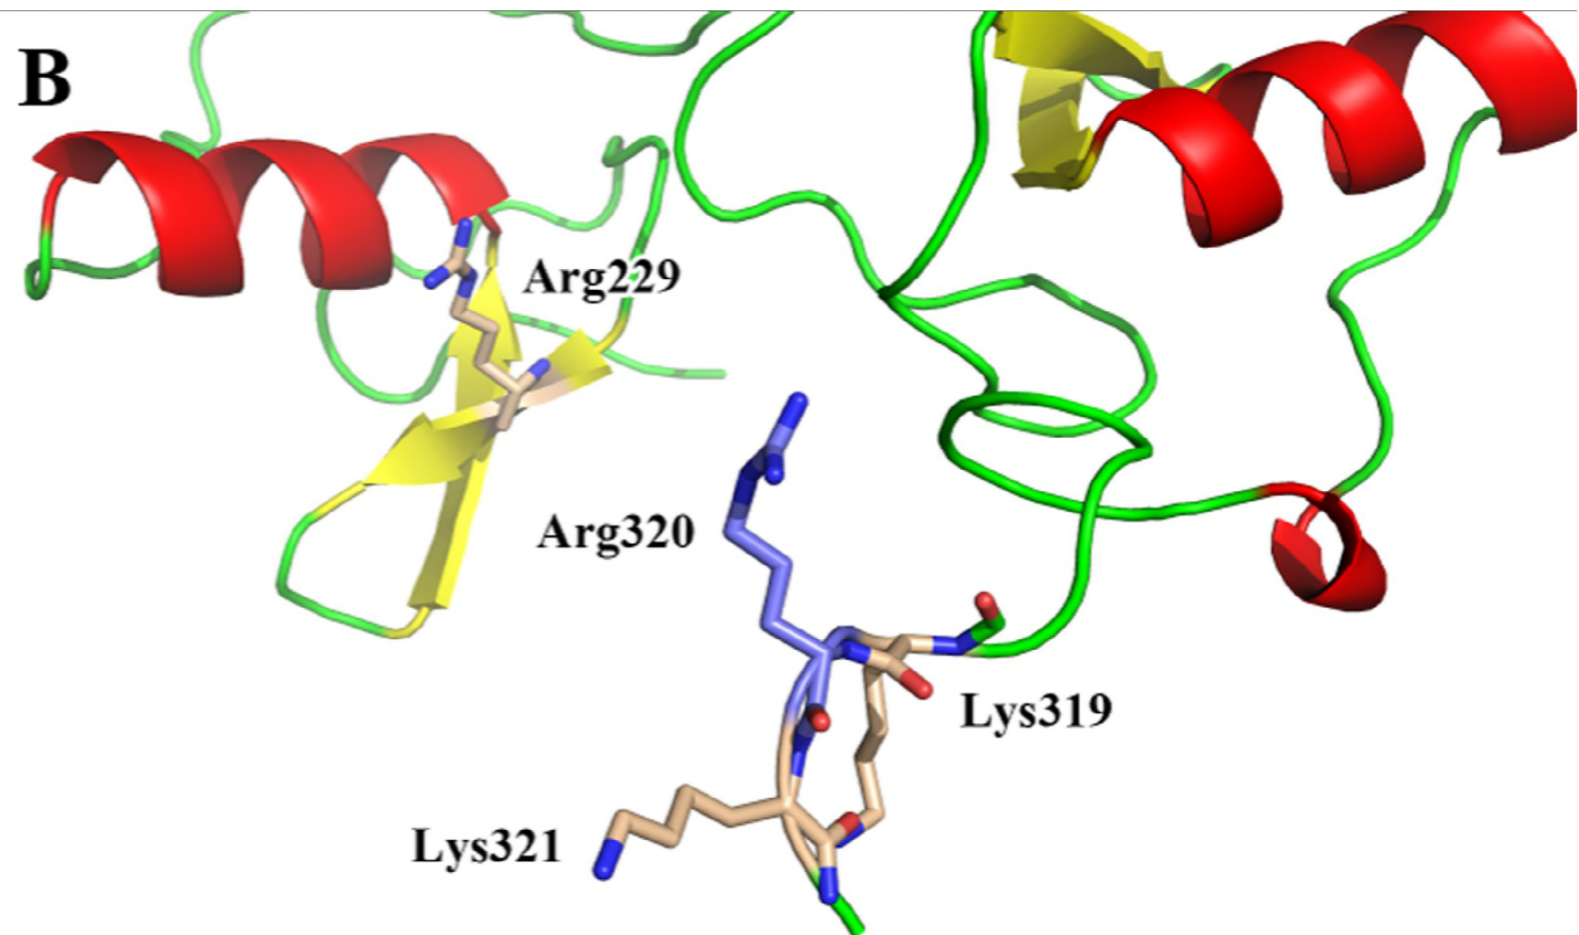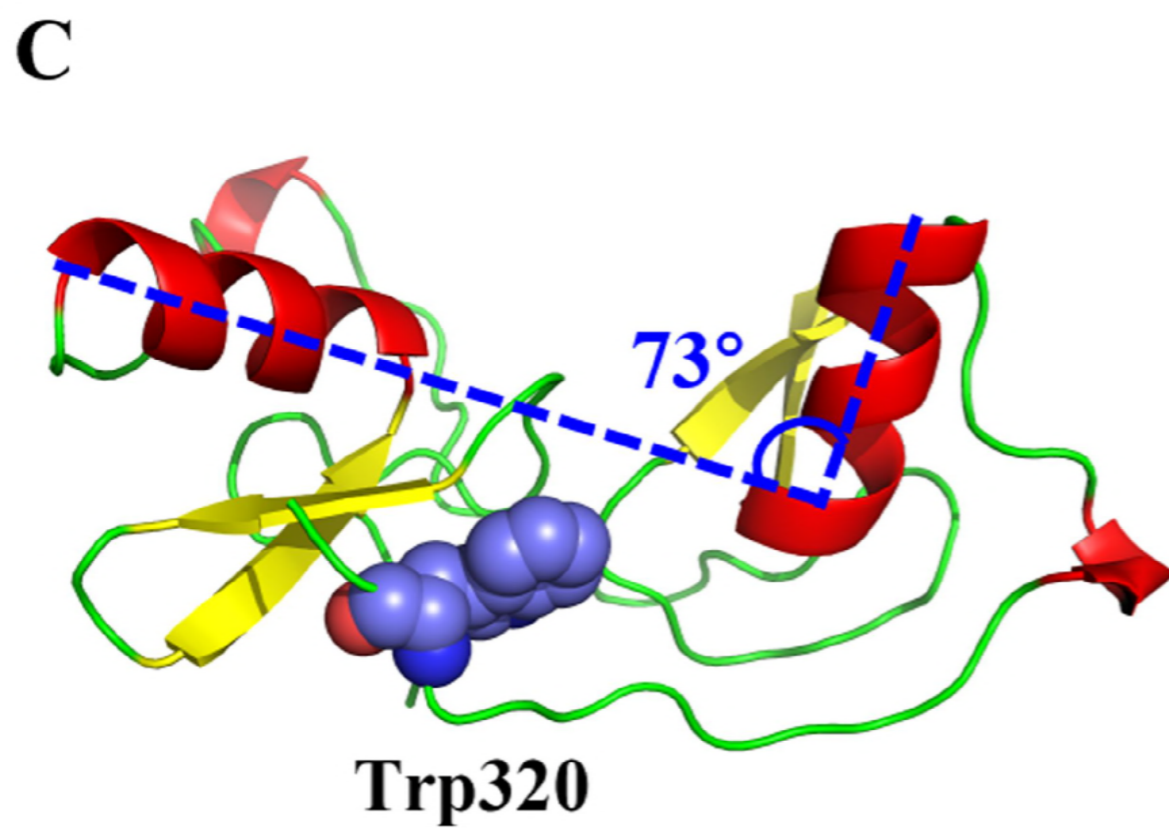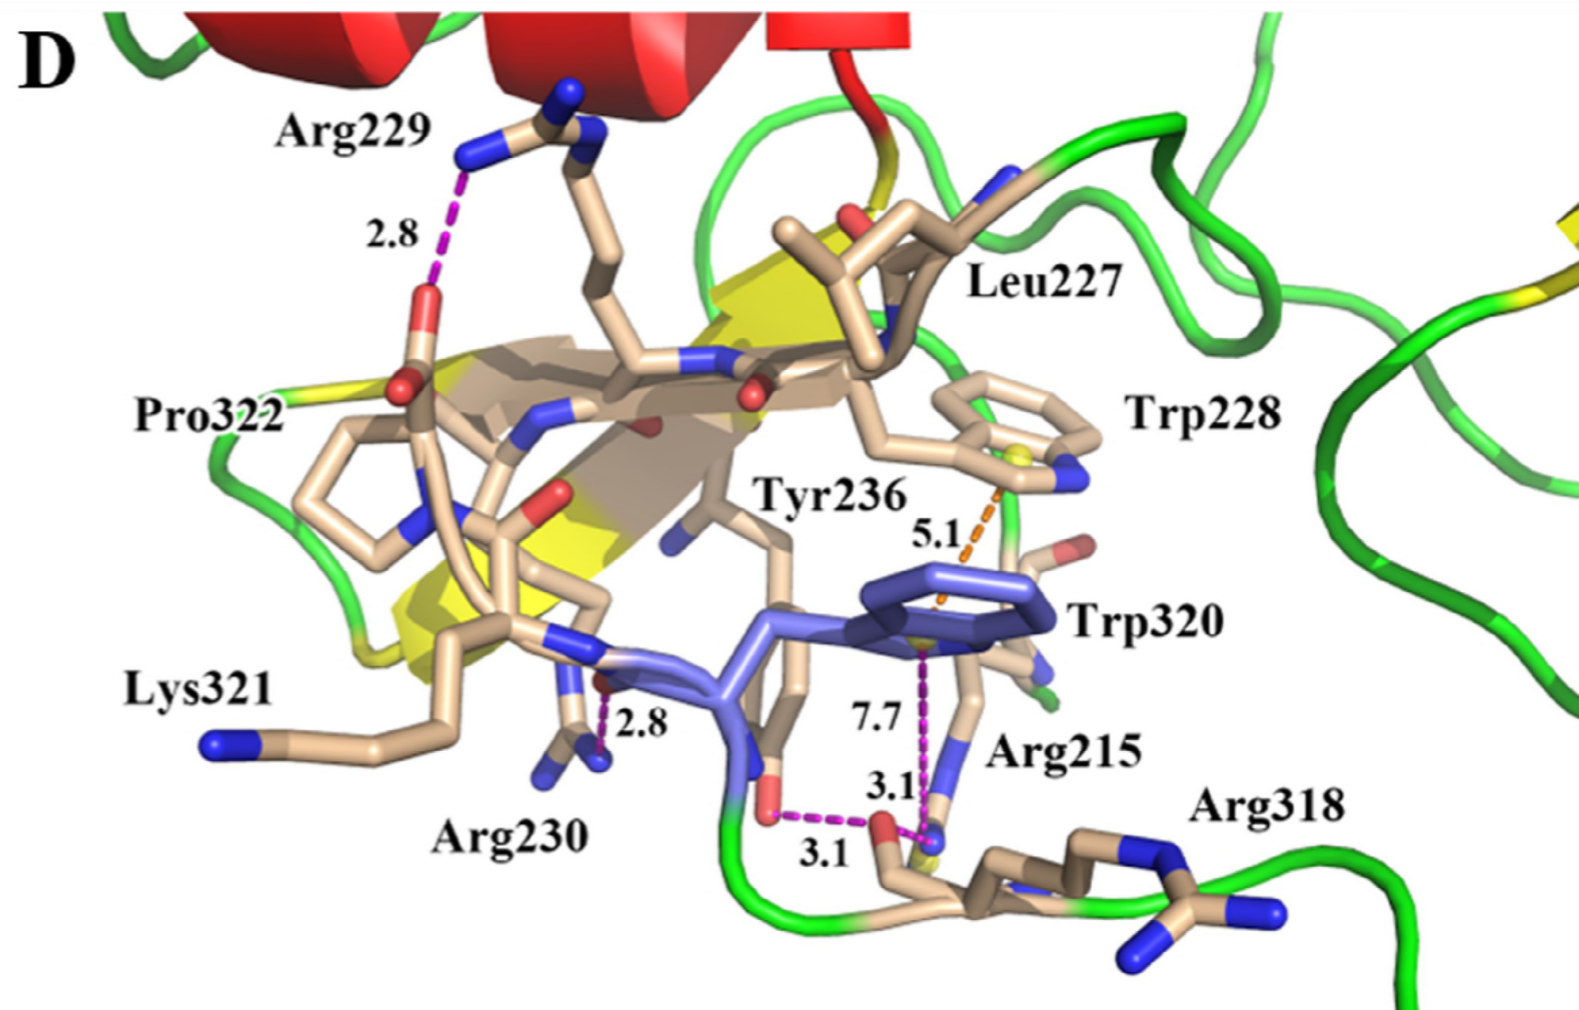

**A**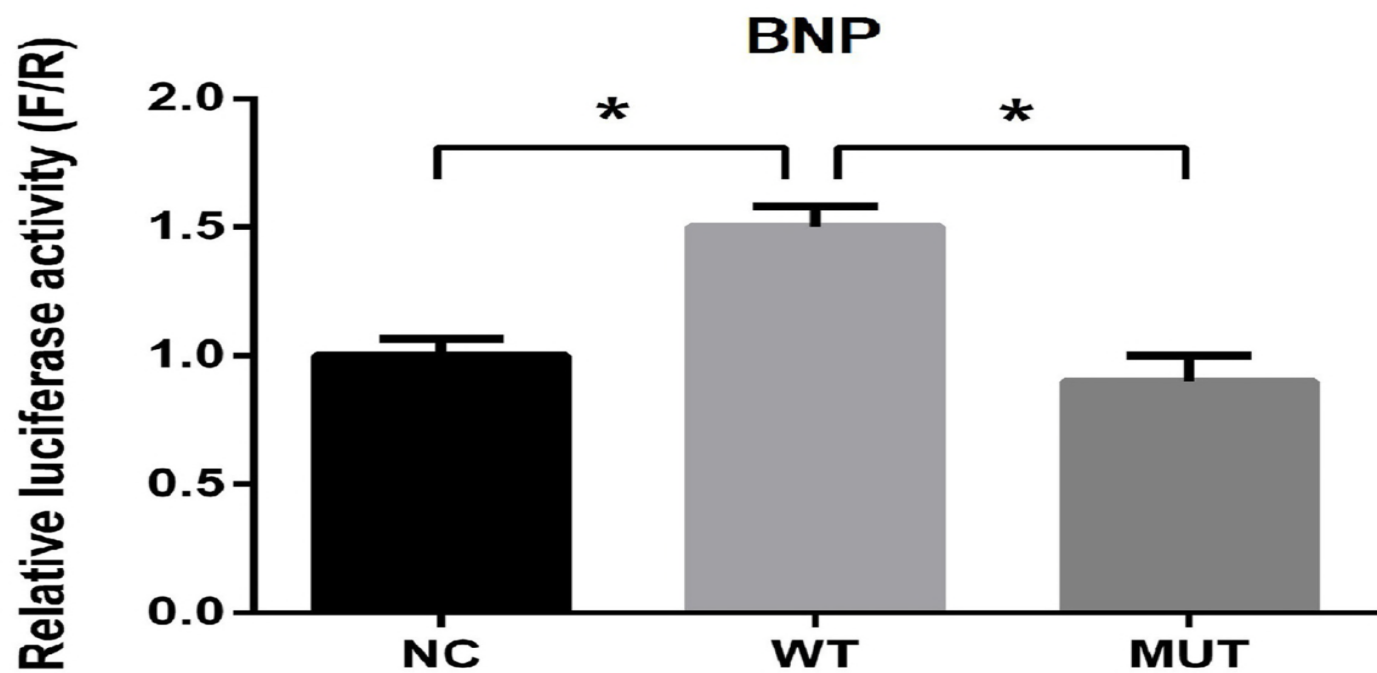**B**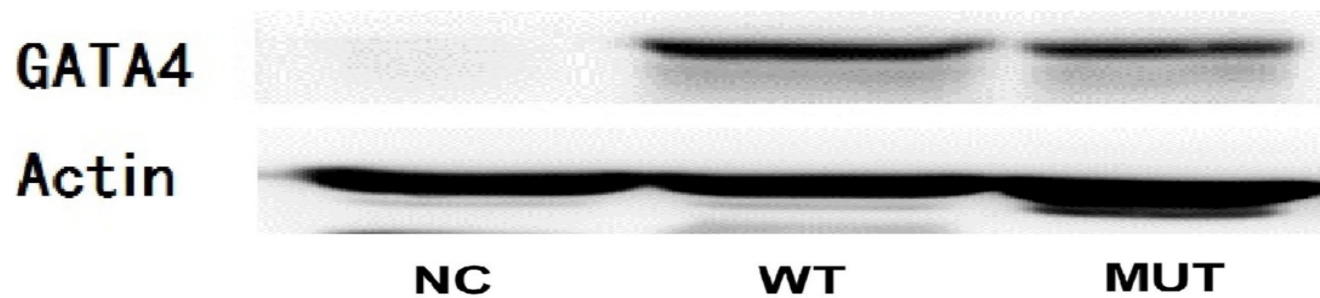

Source: https://www.biorxiv.org/content/10.1101/277780v1.full.pdf
